# Supplementary material for: Effect of Mat Moisture Content, Adhesive Amount and Press Time on the Performance of Particleboards Bonded with Fructose-Based Adhesives
Source: MDPI journal article supplement (doi:10.3390/ma15238701), 2022-12-06
Supplement: s1 [file s1]

# Effect of Mat Moisture Content, Adhesive Amount and Press Time on the Performance of Particleboards Bonded with Fructose-Based Adhesives

## 1. Pearson Correlation coefficient

**Table S1.** Pearson coefficient: Density- IB relation, for unconditioned and conditioned PB of Press series 1 (Mat moisture content variation).

| Particleboard (Press Series 1) | Pearson Coefficient (95% Confidential Interval) |
|--------------------------------|-------------------------------------------------|
| SusB_12%_cond._1               | 0.90358                                         |
| SusB_12%_cond._2               | 0.37361                                         |
| SusB_10%_cond._1               | 0.53561                                         |
| SusB_10%_cond._2               | 0.36308                                         |
| SusB_8.7%_cond._1              | 0.72924                                         |
| SusB_8.7%_cond._2              | 0.39686                                         |
| Particleboard (Press Series 2) | Pearson Coefficient (95% Confidential Interval) |
| PMDI_10s/mm_cond._1            | 0.84563                                         |
| PMDI_10s/mm_cond._2            | 0.95459                                         |
| SusB_10s/mm_cond._1            | 0.91429                                         |
| SusB_10s/mm_cond._2            | 0.91378                                         |
| SusB_14s/mm_cond._1            | 0.9170                                          |
| SusB_14s/mm_cond._2            | 0.8265                                          |
| SusB_8s/mm_cond._1             | 0.86243                                         |
| SusB_8s/mm_cond._2             | 0.65301                                         |

## 2. Turkey's Post Hoc Test

Density of produced particleboards (each boxplot contains the data from two boards):

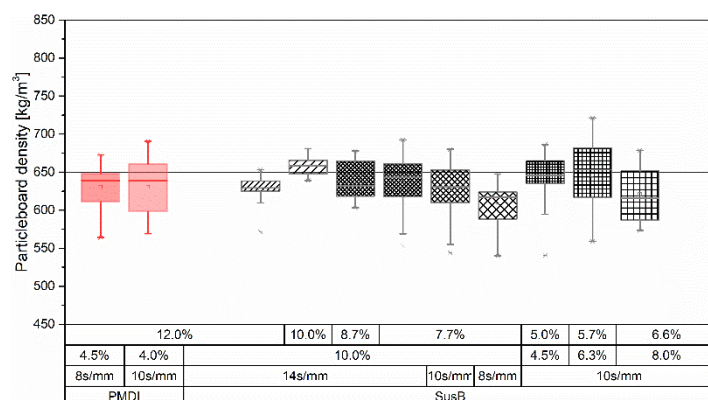

**Figure S1.** Density of the produced particleboards from press series 1 & 2, Target density=650 kg/m³.

**Table S2.** Turkey's Post hoc test: Particleboards with a significant difference in density at a confidence interval of 95%.

| Adhesive/Press Factor/<br>Adh.Amount/ MMC    | Mean Dif-<br>ference | Standard<br>Error | q-Value | p-Value | Significance | 95% Confidence Interval |             |
|----------------------------------------------|----------------------|-------------------|---------|---------|--------------|-------------------------|-------------|
|                                              |                      |                   |         |         |              | Lower<br>Bound          | Upper Bound |
| SusB/14s/mm/10%/10%<br>SusB/10s/mm/8.0%/6.6% | 37.39                | 10.62             | 4.977   | 0.022   | significant  | 2.81                    | 71.96       |
| SusB/14s/mm/10%/10%<br>SusB/8s/mm/10%/7.7%   | 52.10                | 10.62             | 6.93548 | 9.8E-5  | Significant  | 17.52                   | 86.67       |
| SusB/8s/mm/10%/7.7%<br>SusB/10s/mm/6.3%/5.7% | 39.66                | 10.62             | 5.279   | 0.011   | significant  | 5.08                    | 74.23       |

**Table 3.** Wood particle size distribution.

| Sieve<br>size<br>mm   |
|-----------------------|-----------------------|-----------------------|-----------------------|-----------------------|-----------------------|-----------------------|-----------------------|-----------------------|
| 8.0                   | 4.0                   | 2.0                   | 1.4                   | 1.0                   | 0.8                   | 0.4                   | 0.2                   | <0.2                  |
| Particle<br>mass<br>g |
| 1.79                  | 41.24                 | 132.15                | 27.38                 | 41.47                 | 12.19                 | 31.89                 | 11.03                 | 5.07                  |
